# Supplementary material for: Functional Characterization of the MeSSIII-1 Gene and Its Promoter from Cassava
Source: MDPI journal article supplement (doi:10.3390/ijms25094711), 2024-04-26
Supplement: s1 [file s1]

## Supplementary Date

### Supplementary Figures

-1228 ATTTTAAATCTTTTATTATGGATTAGATTTTTAAATTAGTTATTC  
ERF

-1178 AATAGATTTTATATTAGACCTTAGAAATCTCTCTATTTTCAGATAA

-1128 GTTTTGAGCCTTTTAACATATAAGTTTTTAAATATTATGTAAATTTGGG

-1078 AATATTTTATTTCATCTAATGAATATTATTATCTTAAATAAAAAAAT

-1028 TGTTGACATGAAATAATTATTGCACTATATATTTTCCATTTTCCTGCG  
O<sup>2</sup>-site

-978 AATTTGTAACAAAGGAAAAGGAAAAAAGATCCTACTAATGAGCTAATATT  
GATA-motif

-928 TAGTACCATGTAGTGAAAAGATTTTAAATTATAATATAATAAACATAA  
ERF

-878 TGGCATTAAATTATATGAAAATTGTAAATTATAATGTATGATTTTAAA  
ERF

-828 AAAGAATTCAAATAACTTTCATATATGATTAAACAATTTTAAATTTAA

-778 AAAAATAAATTAATTACTGTAATCATTATTGGCATTGTCATCATCATCA  
Box 4

-728 TTATTATTGCTATAAATAAATATTATAATAAAAACTATTATCCCTTAACA

-678 TCACTTAACATTTCTTTTTACAACCTCACTTCATTTAGAATGAGTTATTTT

-628 GAAAAGAAATAATTTTATAAAATTTTATTTTTTTAAATAAAATAAAA  
ERF

-578 TATTCTTTTATTTCAACTAATAAAAAATAATTAAATTAAATTAAATAAA  
AT1-motif

-528 TATCAGCCAATGTTTCAAATTGGAGTTAAATATATGAAAAATCGATTGGTTT  
ARE

-478 TTCCCCACAAGAGTTGGTGAAAAGATTACTTTACCTATTATTTTATAG

-428 TAGACTCCAACAGCAAGAGCGCCAACGTGGCAAATATTTATTGACGTATCA  
G-Box/ABRE TGACG-motif

-378 CTTCCAACGAATCTAAGCCTATCATCAGATCACAGATGGATAATAGCCTT  
ATCT-motif

-328 AAAAACATTAAATACCGAATTATTTATTCTTAAAAAAAATTTTAAAATT  
ERF

-278 ACAAAAAAAAAATTACATGCCGCTTATCTTTGTACAAGATCTTATCTTTG  
GATA-motif

-228 TACAAGATCACACAATGGACGGCACAAAAAGCTACCGCAATGTTCACTGG

-178 AACGTAGCAATCAACGGTCAGTATGCTGCGCATTTGTAAACATTGTAGGC  
CCAAT-box

-128 TGCATCGTAGAAGATTACAATCATTATTATTAATAGTTATGGCTGATATT  
Box 4

-78 CTTGCTACTCCAGTGCATTCTTGTTGTAGTGAGAACTGAGAACAATTT

-28 TCGATTCTGAGTTGGTAACCGTCAGCCATGGAAGTGGGTTTGCAGGT  
CGTCA-motif

**Figure S1.** Physical map of *MeSSIII-1* promoter. The “A” of translation initiation code “ATG” of *MeSSIII-1* was designated as “+1”. The TATA-box is highlighted in bold. Putative *cis*-acting elements are underlined, colored and labeled. The *cis*-acting elements sites on the positive strand and the negative strand are shown in red and blue, respectively.

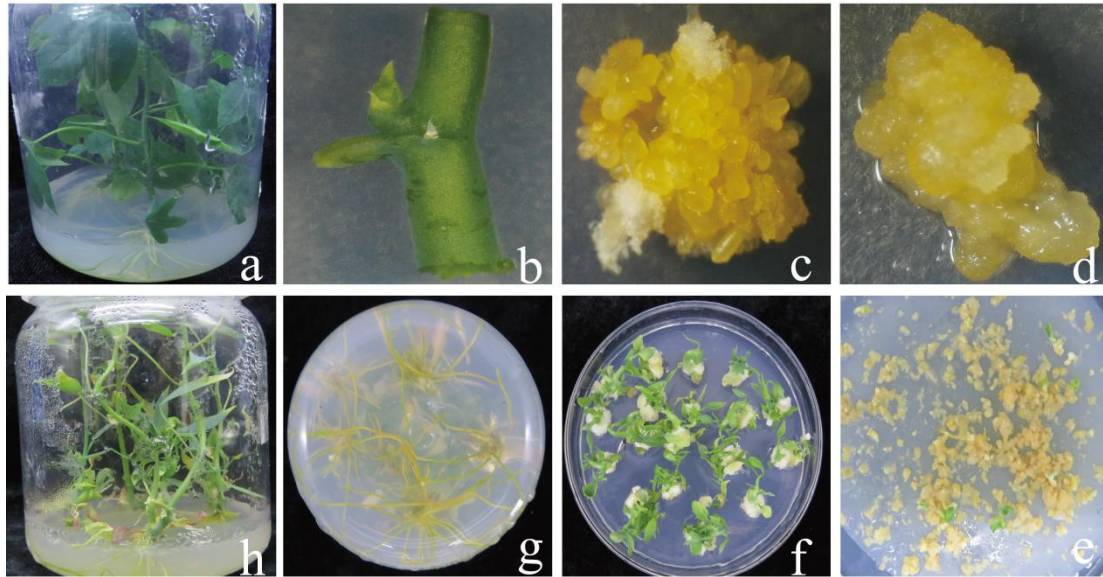

**Figure S2.** *Agrobacterium*-mediated genetic transformation of cassava SC8 FECs  
a Aseptic culture seedling. b Axillary bud. c Somatic embryo. d Fragile embryonic calli. e Induction of resistant cotyledons. f Induction of regeneration shoots. g Rooting Screening. h Regeneration of resistant plants.

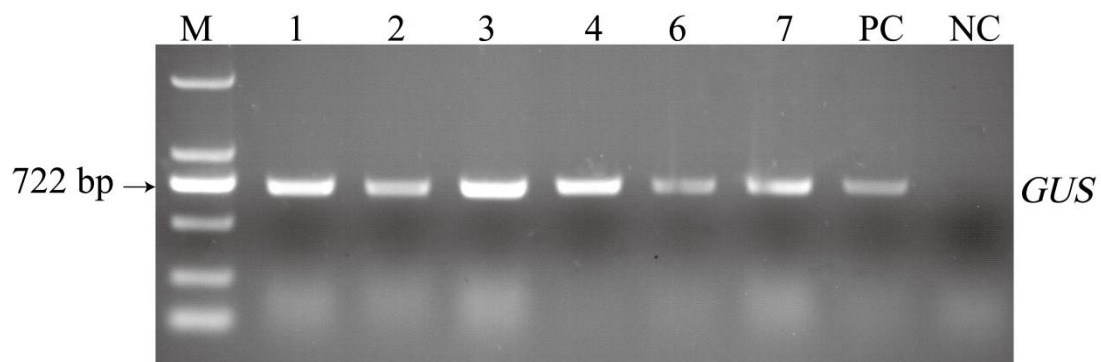

**Figure S3.** PCR identification of the proMeSSIII-1 transgenic plants by *GUS*.  
M: 2000 DNA marker. 1-7: transgenic plants. PC: positive control. NC: negative control.

## Supplementary Tables

**Table S1** Primers used in this study

| Table S1 Primers used in this study |                                                |                                         |
|-------------------------------------|------------------------------------------------|-----------------------------------------|
| Primer name                         | Primer sequencess (5'→3')                      | Purpose                                 |
| qMeSSIII-1-F                        | TGGGTTTGCAGGTACACAGA                           | For qPCR                                |
| qMeSSIII-1-R                        | GGAAAGACCCAGAGAGACGA                           | For qPCR                                |
| qTUB-F                              | ATGCGGTTCTTGATGTTGTTC                          | For qPCR                                |
| qTUB-R                              | TCGGTGAAGGGAATACAGAGA                          | For qPCR                                |
| MeSSIII-1-F                         | TGAGTTGGTAACCGTCAGCC                           | For <i>MeSSIII-1</i> gene amplification |
| MeSSIII-1-R                         | ACAAATATGGTGTGCGGGGT                           | For <i>MeSSIII-1</i> gene amplification |
| 1300-MeSSIII-1-F                    | tgatacatatgcccgctgacATGGAAGTGGGTTTGCAGGTAC     | For construction                        |
| 1300-MeSSIII-1-R                    | tgggtaggatccggtaccTGAGAACCATGACCTGTGGG         | For construction                        |
| 1300-F                              | CGGGGGACTCTAGATACATCA                          | For vector detection                    |
| 1300-R                              | CTTGTGGCCGTTTACGTCG                            | For vector detection                    |
| proMeSSIII-1-F                      | CTCTTCTATTCTGCCTGA                             | For promoter amplification              |
| proMeSSIII-1-R                      | TGAGGGAAAGACCCAGAG                             | For promoter amplification              |
| SP0-F                               | GGATCCTCTAGAGTCGACATTTTTTAAATCTTTTAT<br>TATGGA | For construction                        |
| SP1-F                               | GGATCCTCTAGAGTCGACTTTCCTGCGAATTTGTA<br>ACAAAGG | For construction                        |
| SP2-F                               | GGATCCTCTAGAGTCGACGGCATTGTCATCATCAT<br>CATTAT  | For construction                        |
| SP3-F                               | GGATCCTCTAGAGTCGACATCGATGGTTTTTCCCC<br>ACA     | For construction                        |
| SP4-F                               | GGATCCTCTAGAGTCGACACATGCCGCTTATCTTT<br>GTACA   | For construction                        |
| SP-R                                | CTTACTAGTCAGATCTACCATGGCTGACGGTTAC<br>CAACT    | For construction                        |
| GUS-F                               | CCTCGCATTACCCTTACGCT                           | For identification                      |
| GUS-R                               | TTTCTTGTTACCGCCAACGC                           | For identification                      |

**Table S2** Main *cis*-acting elements in *MeSSIII-1* promoter

| <b><i>Cis</i>-elements</b> | <b>Number</b> | <b>Function</b>                                                              | <b>Core Sequence</b> |
|----------------------------|---------------|------------------------------------------------------------------------------|----------------------|
| CAAT-box                   | 22            | common <i>cis</i> -acting element in promoter and enhancer regions           | CAAT                 |
| TATA-box                   | 48            | core promoter element around -30 of transcription start                      | TATA                 |
| ABRE                       | 1             | <i>cis</i> -acting element involved in the abscisic acid responsiveness      | ACGTG                |
| ARE                        | 1             | <i>cis</i> -acting regulatory element essential for the anaerobic induction  | AAACCA               |
| AT1-motif                  | 1             | part of a light responsive module                                            | AATTATTTTTT<br>ATT   |
| GATA-motif                 | 2             | part of a light responsive element                                           | AAGATAAGAT<br>T      |
| ATCT-motif                 | 1             | part of a conserved DNA module involved in light responsiveness              | GAATCTAAGC<br>C      |
| Box 4                      | 2             | part of a conserved DNA module involved in light responsiveness              | ATTAAT               |
| G-Box                      | 1             | <i>cis</i> -acting regulatory element involved in light responsiveness       | CACGTT               |
| ERE                        | 6             | ethylene-responsive element                                                  | ATTTTAAA             |
| CGTCA-motif                | 2             | <i>cis</i> -acting regulatory element involved in the MeJA-responsiveness    | CGTCA                |
| TGACG-motif                | 2             | <i>cis</i> -acting regulatory element involved in the MeJA-responsiveness    | TGACG                |
| O <sup>2</sup> -site       | 1             | <i>cis</i> -acting regulatory element involved in zein metabolism regulation | GTTGACATGA           |
